# Supplementary material for: Clinical-functional correlation with brain volumetry in severe perinatal asphyxia: a case report
Source: Springer Nature journal article supplement (doi:10.1186/s13052-024-01633-w), 2024-04-09
Supplement: MOESM1 [file 26960020]

# Reporte de Volumetría

Grupo de Investigación en Salud Comfamiliar

## Volumen

Table 1: Información Básica

| Paciente ID | Sexo      | Edad     | Fecha Resonancia |
|-------------|-----------|----------|------------------|
| 1           | Masculino | 17 Meses | 14/07/2016       |

Table 2: Volumen Macro

| Tissue              | mm <sup>3</sup> | %           |
|---------------------|-----------------|-------------|
| White Matter        | 124634,6594     | 19,61175341 |
| Gray Matter         | 240389,742      | 37,82627053 |
| Brain               | 365024,4014     | 57,43802394 |
| Intracranial Volume | 635510,0269     | 100         |

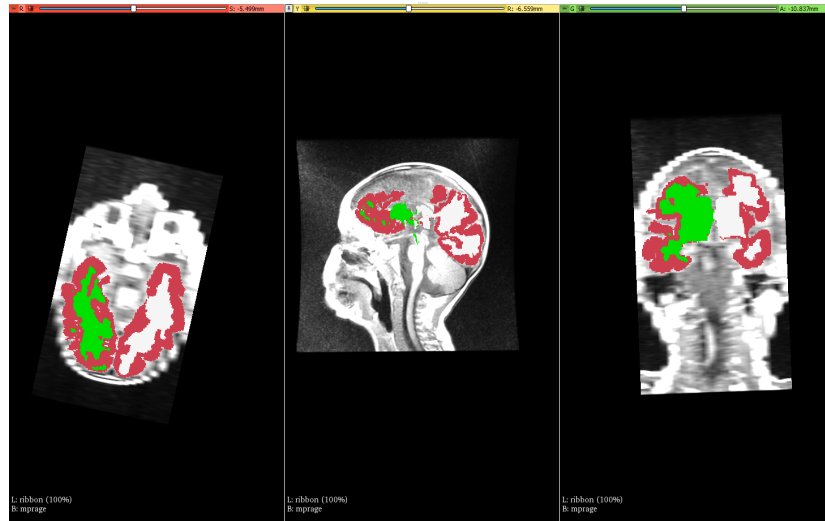

Figure 1: WM y GM

Table 3: Volumen Hemisferios

| Tissue       | Left (mm <sup>3</sup> ) | Right (mm <sup>3</sup> ) | Left (%)    | Right (%)   | Asymmetry (%) |
|--------------|-------------------------|--------------------------|-------------|-------------|---------------|
| White Matter | 56636,25679             | 67998,40258              | 8,91193756  | 10,69981585 | 18,23272251   |
| Gray Matter  | 117327,8683             | 123061,8737              | 18,46200113 | 19,3642694  | 4,770590716   |
| Total        | 173964,1251             | 191060,2763              | 27,37393869 | 30,06408525 | 9,367127836   |

Table 4: Volumen Estructuras

| structure_name           | lf_volume (mm <sup>3</sup> ) | rh_volume (mm <sup>3</sup> ) | lf_volume (%) | rh_volume (%) | Asymmetry (%) |
|--------------------------|------------------------------|------------------------------|---------------|---------------|---------------|
| bankssts                 | 569                          | 1166                         | 0.089534386   | 0.183474682   | 68,8184438    |
| caudalmiddlefrontal      | 4644                         | 2081                         | 0.730751649   | 0.327453527   | 76,22304833   |
| cuneus                   | 1356                         | 2496                         | 0.213371928   | 0.392755408   | 59,19003115   |
| entorhinal               | 776                          | 1254                         | 0.122106649   | 0.197321828   | 47,09359606   |
| fusiform                 | 3989                         | 4784                         | 0.627684825   | 0.752781199   | 18,1237889    |
| inferiorparietal         | 5430                         | 9851                         | 0.854431837   | 1.55009356    | 57,86270532   |
| inferiortemporal         | 5814                         | 5516                         | 0.914855746   | 0.867964275   | 5,260370697   |
| isthmuscingulate         | 493                          | 982                          | 0.077575487   | 0.154521559   | 66,30508475   |
| lateraloccipital         | 7842                         | 9823                         | 1.233969516   | 1.54568765    | 22,42853099   |
| lateralorbitofrontal     | 4741                         | 3786                         | 0.74601498    | 0.595741977   | 22,39943708   |
| lingual                  | 2451                         | 4423                         | 0.385674481   | 0.69597643    | 57,37561827   |
| medialorbitofrontal      | 6101                         | 3008                         | 0.960016324   | 0.47332062    | 67,91085739   |
| middletemporal           | 4592                         | 6593                         | 0.722569245   | 1.037434458   | 35,78006258   |
| parahippocampal          | 1098                         | 933                          | 0.172774615   | 0.146811216   | 16,24815362   |
| paracentral              | 1598                         | 2237                         | 0.251451579   | 0.35200074    | 33,32464146   |
| parapercularis           | 3047                         | 1612                         | 0.479457423   | 0.253654534   | 61,60120197   |
| parorbitalis             | 1765                         | 2060                         | 0.277729686   | 0.324149095   | 15,4248366    |
| parstriangularis         | 5227                         | 1782                         | 0.82248899    | 0.280404702   | 98,30218291   |
| pericalcarine            | 1302                         | 1141                         | 0.204874816   | 0.179540834   | 13,18051576   |
| postcentral              | 5670                         | 5877                         | 0.892196781   | 0.924769044   | 3,585346843   |
| posteriorcingulate       | 627                          | 649                          | 0.098660914   | 0.1021227     | 3,448275862   |
| precentral               | 4406                         | 4967                         | 0.693301414   | 0.781576968   | 11,97055372   |
| precuneus                | 3457                         | 4235                         | 0.543972534   | 0.666393892   | 20,22880915   |
| rostralanteriorcingulate | 625                          | 419                          | 0.098346206   | 0.065931296   | 39,46360153   |
| rostralmiddlefrontal     | 9336                         | 6979                         | 1.469056286   | 1.098173074   | 28,89365614   |
| superiorfrontal          | 3644                         | 10434                        | 0.573397719   | 1.641830901   | 96,46256571   |
| superiorparietal         | 9584                         | 7097                         | 1.508080061   | 1.116740838   | 29,81835621   |
| superiortemporal         | 5432                         | 6086                         | 0.854746545   | 0.957656015   | 11,35613822   |
| supramarginal            | 3849                         | 5063                         | 0.605655275   | 0.796682945   | 27,24416517   |
| frontalpole              | 651                          | 1598                         | 0.102437408   | 0.251451579   | 84,21520676   |
| temporalpole             | 2947                         | 2339                         | 0.46372203    | 0.368050841   | 23,00416194   |
| transverse temporal      | 596                          | 112                          | 0.093782942   | 0.01762364    | 136,7231638   |
| insula                   | 3266                         | 2359                         | 0.513917934   | 0.37119792    | 32,24888889   |

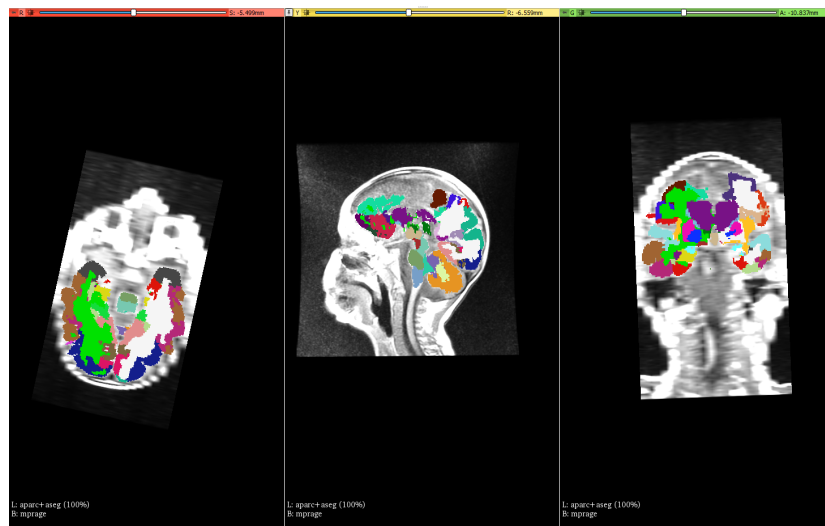

Figure 2: Parcelación de estructuras

# Volumetría

| Tabla de Colores Lobulos |  |                            |
|--------------------------|--|----------------------------|
| 1                        |  | unknown                    |
| 2                        |  | bank ssts                  |
| 3                        |  | caudal anterior cingulate  |
| 4                        |  | caudal middle frontal'     |
| 5                        |  | corpus callosum            |
| 6                        |  | cuneus                     |
| 7                        |  | entorhinal                 |
| 8                        |  | fusiform                   |
| 9                        |  | inferior parietal          |
| 10                       |  | inferior temporal          |
| 11                       |  | isthmuscingulate           |
| 12                       |  | lateral occipital          |
| 13                       |  | lateral orbito frontal     |
| 14                       |  | lingual                    |
| 15                       |  | medial orbito frontal      |
| 16                       |  | middle temporal            |
| 17                       |  | parahippocampal            |
| 18                       |  | paracentral                |
| 19                       |  | parsopercularis            |
| 20                       |  | parsorbitalis              |
| 21                       |  | parstriangularis           |
| 22                       |  | pericalcarine              |
| 23                       |  | postcentral                |
| 24                       |  | posterior cingulate        |
| 25                       |  | precentral                 |
| 26                       |  | precuneus                  |
| 27                       |  | rostral anterior cingulate |
| 28                       |  | rostral middle frontal     |
| 29                       |  | superior frontal           |
| 30                       |  | superior parietal          |
| 31                       |  | superior temporal          |
| 32                       |  | supramarginal              |
| 33                       |  | frontal pole               |
| 34                       |  | temporal pole              |
| 35                       |  | transverse temporal        |
| 36                       |  | insula                     |

Figure 3: Tabla de colores lóbulos

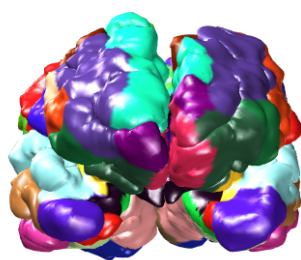

Frontal

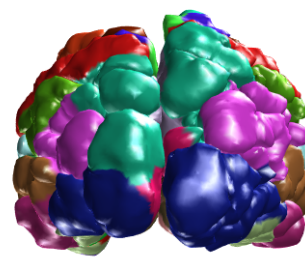

Posterior

Figure 4: Vista Coronal

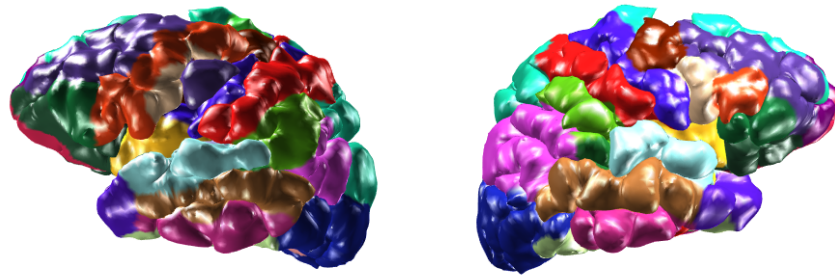

Izquierdo

Derecho

Figure 5: Vista Sagital

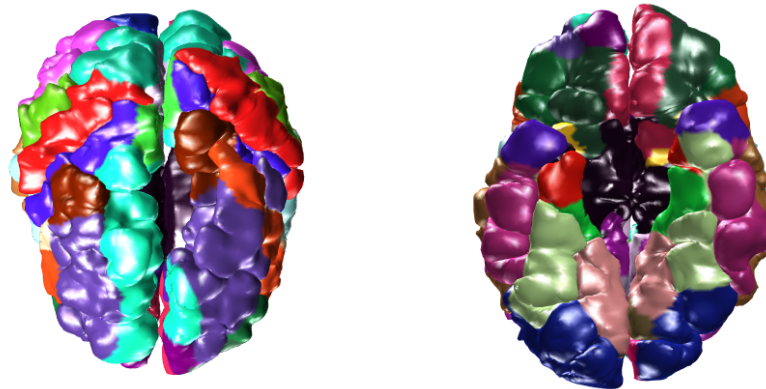

Superior

Inferior

Figure 6: Vista Axial

# Reporte de Volumetría

Grupo de Investigación en Salud Comfamiliar

## Volumen

Table 1: Información Básica

| Paciente ID | Sexo      | Edad     | Fecha Resonancia |
|-------------|-----------|----------|------------------|
| 1           | Masculino | 39 Meses | 24/04/2018       |

Table 2: Volumen Macro

| Tissue              | mm <sup>3</sup> | %           |
|---------------------|-----------------|-------------|
| White Matter        | 88111,33023     | 13,90299288 |
| Gray Matter         | 201976,8174     | 31,86970673 |
| Brain               | 290088,1476     | 45,77269961 |
| Intracranial Volume | 633758,0044     | 100         |

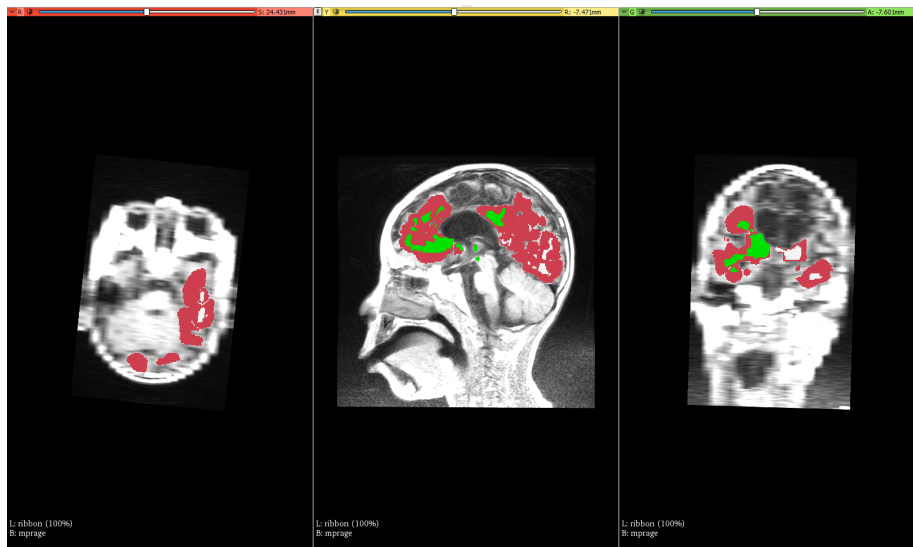

Figure 1: WM y GM

Table 3: Volumen Hemisferios

| Tissue       | Left (mm <sup>3</sup> ) | Right (mm <sup>3</sup> ) | Left (%)    | Right (%)   | Asymmetry (%) |
|--------------|-------------------------|--------------------------|-------------|-------------|---------------|
| White Matter | 34722,56162             | 53388,76861              | 5,478835987 | 8,424156893 | 42,36959525   |
| Gray Matter  | 87028,17665             | 114948,6407              | 13,73208323 | 18,13762349 | 27,64719676   |
| Total        | 121750,7383             | 168337,4093              | 19,21091922 | 26,56178039 | 32,11897586   |

Table 4: Volumen Estructuras

| structure name       | lf volume (mm <sup>3</sup> ) | rh volume (mm <sup>3</sup> ) | lf volume (%) | rh volume (%) | Asymmetry (%) |
|----------------------|------------------------------|------------------------------|---------------|---------------|---------------|
| fusiform             | 3618                         | 10363                        | 0,570880364   | 1,635166724   | 96,48809098   |
| inferioparietal      | 5810                         | 8887                         | 0,916753707   | 1,402270257   | 41,87249098   |
| inferiortemporal     | 21192                        | 1092                         | 3,343863092   | 0,172305516   | 180,3984922   |
| lateraloccipital     | 3685                         | 62979                        | 0,581452222   | 9,937389282   | 177,8891156   |
| lateralorbitofrontal | 7298                         | 3045                         | 1,151543641   | 0,480467304   | 82,23919559   |
| middletemporal       | 1780                         | 13                           | 0,280864303   | 0,002051256   | 197,0998327   |
| postcentral          | 3199                         | 2541                         | 0,5047668     | 0,400941682   | 22,92682927   |
| precuneus            | 695                          | 20967                        | 0,109663309   | 3,308360582   | 187,1664666   |
| superioparietal      | 29836                        | 5853                         | 4,707790638   | 0,923538631   | 134,3999552   |
| superiortemporal     | 1180                         |                              | 0,186190942   |               |               |
| supramarginal        | 504                          |                              | 0,079525623   |               |               |
| insula               | 8473                         |                              | 1,336945639   |               |               |

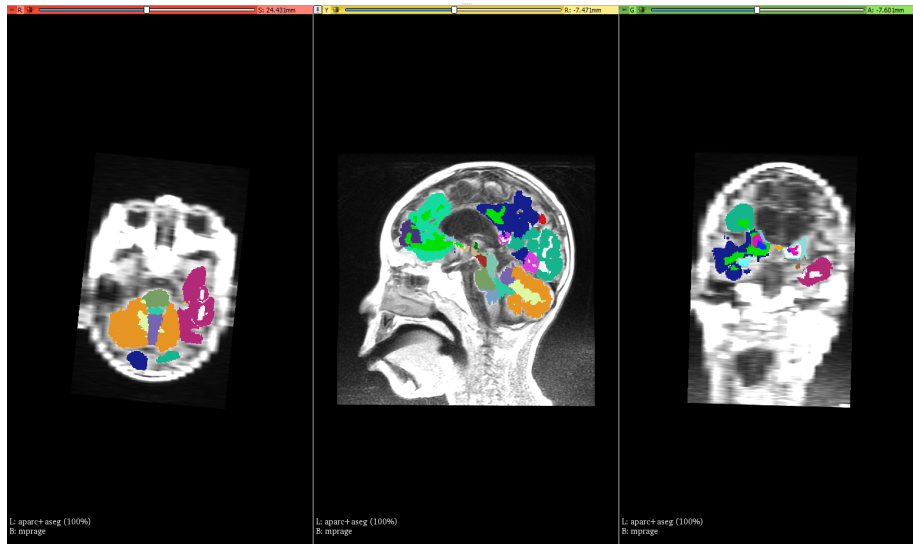

Figure 2: Parcelación de estructuras

# Volumetría

| Tabla de Colores Lobulos |  |                            |
|--------------------------|--|----------------------------|
| 1                        |  | unknown                    |
| 2                        |  | bank ssts                  |
| 3                        |  | caudal anterior cingulate  |
| 4                        |  | caudal middle frontal'     |
| 5                        |  | corpus callosum            |
| 6                        |  | cuneus                     |
| 7                        |  | entorhinal                 |
| 8                        |  | fusiform                   |
| 9                        |  | inferior parietal          |
| 10                       |  | inferior temporal          |
| 11                       |  | isthmuscingulate           |
| 12                       |  | lateral occipital          |
| 13                       |  | lateral orbito frontal     |
| 14                       |  | lingual                    |
| 15                       |  | medial orbito frontal      |
| 16                       |  | middle temporal            |
| 17                       |  | parahippocampal            |
| 18                       |  | paracentral                |
| 19                       |  | parsopercularis            |
| 20                       |  | parsorbitalis              |
| 21                       |  | parstriangularis           |
| 22                       |  | pericalcarine              |
| 23                       |  | postcentral                |
| 24                       |  | posterior cingulate        |
| 25                       |  | precentral                 |
| 26                       |  | precuneus                  |
| 27                       |  | rostral anterior cingulate |
| 28                       |  | rostral middle frontal     |
| 29                       |  | superior frontal           |
| 30                       |  | superior parietal          |
| 31                       |  | superior temporal          |
| 32                       |  | supramarginal              |
| 33                       |  | frontal pole               |
| 34                       |  | temporal pole              |
| 35                       |  | transverse temporal        |
| 36                       |  | insula                     |

Figure 3: Tabla de colores lóbulos

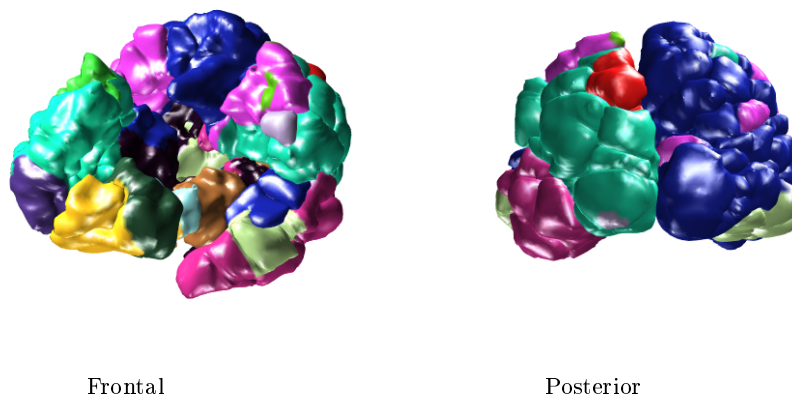

Figure 4: Vista Coronal

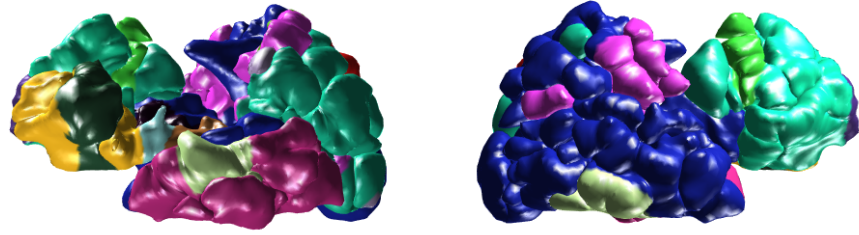

Izquierdo

Derecho

Figure 5: Vista Sagital

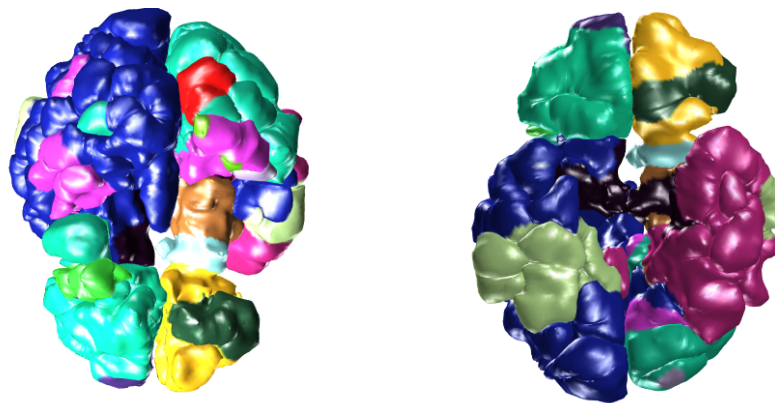

Superior

Inferior

Figure 6: Vista Axial



# Reporte de Volumetría

Grupo de Investigación en Salud Comfamiliar

## Volumen

Table 1: Información Básica

| Paciente ID | Sexo      | Edad   | Fecha Resonancia |
|-------------|-----------|--------|------------------|
| 1           | Masculino | 4 Días | 31/01/2015       |

Table 2: Volumen Macro

| Tissue              | mm <sup>3</sup> | %        |
|---------------------|-----------------|----------|
| White Matter        | 124165,1725     | 36,04492 |
| Gray Matter         | 159476,389      | 46,2957  |
| Brain               | 283641,5615     | 82,34062 |
| Intracranial Volume | 344473,4489     | 100      |

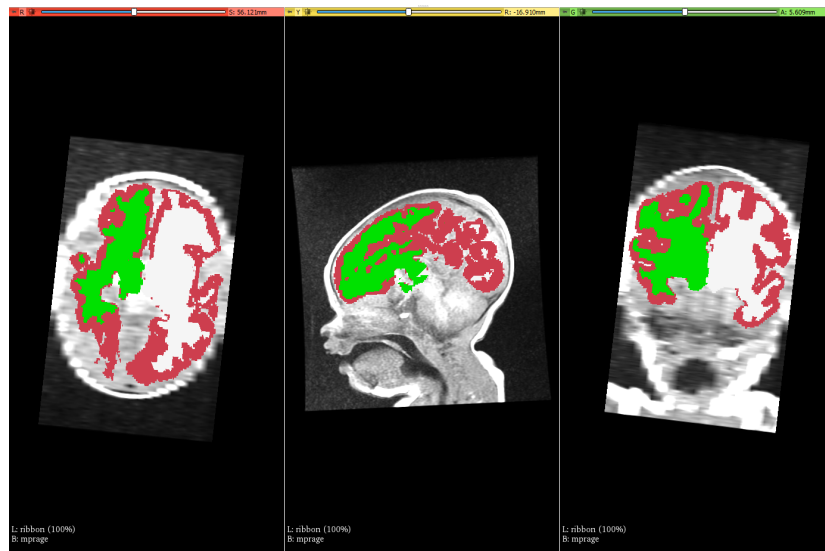

Figure 1: WM y GM

Table 3: Volumen Hemisferios

| Tissue       | Left (mm <sup>3</sup> ) | Right (mm <sup>3</sup> ) | Left (%)    | Right (%)   | Asymmetry (%) |
|--------------|-------------------------|--------------------------|-------------|-------------|---------------|
| White Matter | 64755,89986             | 59409,27263              | 18,798517   | 17,24640109 | 8,61212065    |
| Gray Matter  | 84093,83031             | 75382,55866              | 24,41228216 | 21,88341624 | 10,92484186   |
| Total        | 148849,7302             | 134791,8313              | 43,21079916 | 39,12981733 | 9,912439353   |

Table 4: Volumen Estructuras

| structure name           | lf volume (mm <sup>3</sup> ) | rh volume (mm <sup>3</sup> ) | lf volume (%) | rh volume (%) | Asymmetry (%) |
|--------------------------|------------------------------|------------------------------|---------------|---------------|---------------|
| bankssts                 | 795                          | 700                          | 0.230787018   | 0.203208695   | 12.7090301    |
| caudalanteriorcingulate  | 588                          | 664                          | 0.170695304   | 0.192757962   | 12.14057508   |
| caudalmiddlefrontal      | 1487                         | 1749                         | 0.431673328   | 0.507731439   | 16.19283066   |
| cuneus                   | 773                          | 1809                         | 0.224400459   | 0.525149327   | 80.24786987   |
| entorhinal               | 410                          | 462                          | 0.119022236   | 0.134117739   | 11.9266055    |
| fusiform                 | 2365                         | 1497                         | 0.686555091   | 0.434576309   | 44.95080269   |
| inferioparietal          | 5667                         | 4436                         | 1.645119535   | 1.28776253    | 24.36899931   |
| inferiortemporal         | 2481                         | 1809                         | 0.720229675   | 0.525149327   | 31.32867133   |
| isthmuscingulate         | 1257                         | 841                          | 0.364904757   | 0.244140732   | 39.65681602   |
| lateraloccipital         | 6127                         | 4860                         | 1.778656677   | 1.410848939   | 23.06362064   |
| lateralorbitofrontal     | 1387                         | 1489                         | 0.402643514   | 0.432253924   | 7.093184979   |
| lingual                  | 3384                         | 2757                         | 0.982368891   | 0.80035196    | 20.42012702   |
| medialorbitofrontal      | 1233                         | 1323                         | 0.357937601   | 0.384064434   | 7.042253521   |
| middletemporal           | 2647                         | 2787                         | 0.768419165   | 0.809060904   | 5.152741995   |
| parahippocampal          | 553                          | 549                          | 0.160534869   | 0.159373676   | 0.725952813   |
| paracentral              | 1677                         | 1908                         | 0.486829974   | 0.553888843   | 12.88702929   |
| paropercularis           | 1116                         | 1005                         | 0.323972719   | 0.291749626   | 10.46676096   |
| parorbitalis             | 415                          | 560                          | 0.120473726   | 0.162566956   | 29.74358974   |
| parstriangularis         | 1098                         | 1103                         | 0.318747353   | 0.320198844   | 0.454338937   |
| pericalcarine            | 1034                         | 1154                         | 0.300168272   | 0.335004049   | 10.96892139   |
| postcentral              | 6080                         | 3089                         | 1.765012665   | 0.896730941   | 65.24157487   |
| posteriorcingulate       | 994                          | 1004                         | 0.288556347   | 0.291459328   | 1.001001001   |
| precentral               | 4381                         | 5138                         | 1.271796132   | 1.491551821   | 15.90503204   |
| precuneus                | 3412                         | 4036                         | 0.990497239   | 1.171643276   | 16.75617615   |
| rostralanteriorcingulate | 505                          | 343                          | 0.146600559   | 0.099572261   | 38.20754717   |
| rostralmiddlefrontal     | 3659                         | 3789                         | 1.062200878   | 1.099939636   | 3.490870032   |
| superiorfrontal          | 5642                         | 6083                         | 1.637862082   | 1.765883559   | 7.52238806    |
| superiorparietal         | 8361                         | 7435                         | 2.427182712   | 2.158366639   | 11.72448721   |
| superiortemporal         | 4950                         | 3621                         | 1.436975772   | 1.051169549   | 31.01155058   |
| supramarginal            | 5967                         | 3765                         | 1.732208976   | 1.092972481   | 45.25277435   |
| frontalpole              | 182                          | 597                          | 0.052834261   | 0.173307987   | 106.5468549   |
| temporalpole             | 786                          | 992                          | 0.228174335   | 0.287975751   | 23.17210349   |
| transverse temporal      | 401                          | 339                          | 0.116409552   | 0.098411068   | 16.75675676   |
| insula                   | 2082                         | 1695                         | 0.604400718   | 0.49205534    | 20.49245433   |

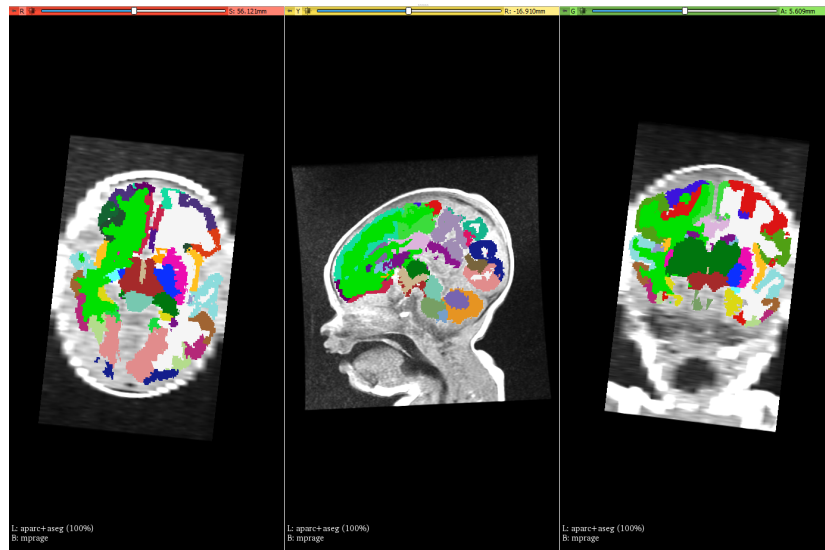

Figure 2: Parcelación de estructuras

## Volumetría

| Tabla de Colores Lobulos |  |                            |
|--------------------------|--|----------------------------|
| 1                        |  | unknown                    |
| 2                        |  | bank ssts                  |
| 3                        |  | caudal anterior cingulate  |
| 4                        |  | caudal middle frontal'     |
| 5                        |  | corpus callosum            |
| 6                        |  | cuneus                     |
| 7                        |  | entorhinal                 |
| 8                        |  | fusiform                   |
| 9                        |  | inferior parietal          |
| 10                       |  | inferior temporal          |
| 11                       |  | isthmuscingulate           |
| 12                       |  | lateral occipital          |
| 13                       |  | lateral orbito frontal     |
| 14                       |  | lingual                    |
| 15                       |  | medial orbito frontal      |
| 16                       |  | middle temporal            |
| 17                       |  | parahippocampal            |
| 18                       |  | paracentral                |
| 19                       |  | parsopercularis            |
| 20                       |  | parsorbitalis              |
| 21                       |  | parstriangularis           |
| 22                       |  | pericalcarine              |
| 23                       |  | postcentral                |
| 24                       |  | posterior cingulate        |
| 25                       |  | precentral                 |
| 26                       |  | precuneus                  |
| 27                       |  | rostral anterior cingulate |
| 28                       |  | rostral middle frontal     |
| 29                       |  | superior frontal           |
| 30                       |  | superior parietal          |
| 31                       |  | superior temporal          |
| 32                       |  | supramarginal              |
| 33                       |  | frontal pole               |
| 34                       |  | temporal pole              |
| 35                       |  | transverse temporal        |
| 36                       |  | insula                     |

Figure 3: Tabla de colores lóbulos

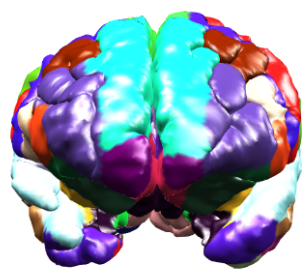

Frontal

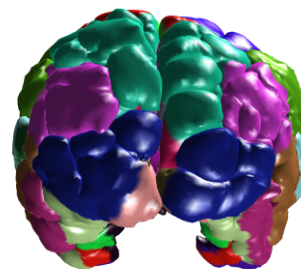

Posterior

Figure 4: Vista Coronal

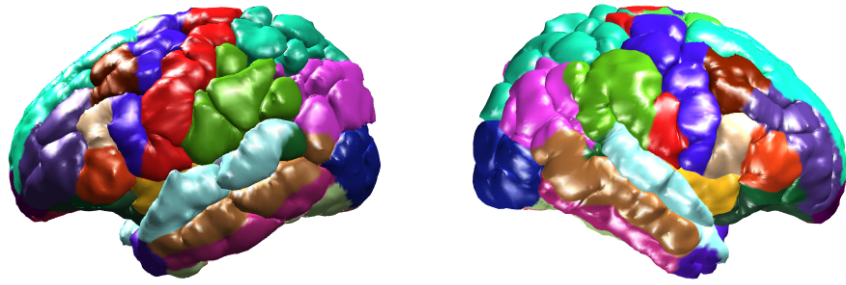

Izquierdo

Derecho

Figure 5: Vista Sagital

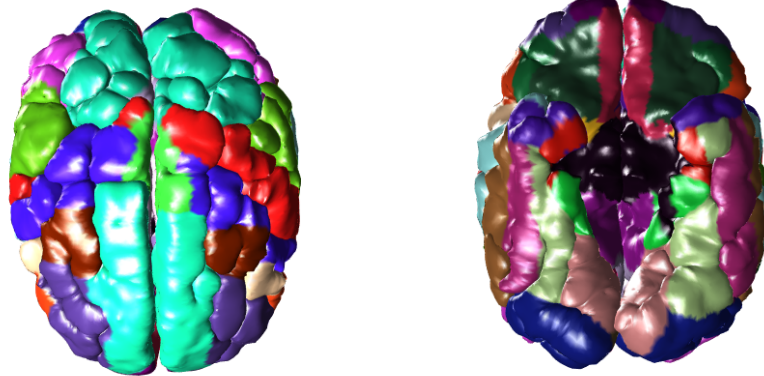

Superior

Inferior

Figure 6: Vista Axial
